# Supplementary material
Source: publisher figshare collection journal article supplement (https://tandf.figshare.com/articles/dataset/_/5432662)
Supplement: Supplementary file 1 [file 1]

Survey on speech-language therapists' perceptions of their current practices in augmentative and alternative communication

## Biographical Information

Q1. Are you a Speech-Language Pathologist?

Yes

No

Q2. Are you registered with the HPCSA?

Yes

No

Q3. Do you currently provide augmentative and alternative communication (AAC) services?

Yes

No

Q4. In what age range do you fall?

20-25 years

26-30 years

31-40 years

41-50 years

51-60 years

Above 60 years

Q5. What is your gender?

Male

Female

Q6. What is your home language?

English  
Afrikaans  
isiNdbele  
isiXhosa  
isiZulu  
Sepedi  
Sesotho  
Setswana  
siSwati  
Tshivenda  
Xsitsonga

Other, please specify

Q7. Have you completed your Master's in AAC?

Yes  
No

Q8. In what year did you obtain a Master's degree?

Please specify which year you obtained your MAAC, e.g. 2010

Q9. How many years' experience do you have in implementing AAC?

Less than 1 year  
Between 1 and 2 years  
Between 3 and 5 years  
Between 6 and 10 years  
More than 10 years

Q10. Have you attended any additional courses/workshops/in-service training in AAC other than a MAAC?

Yes  
No

Q11. If yes, please indicate in what form this additional training took place :

Courses and Workshops  
Web-based training  
In-house training

Q12. Which Province do you currently work in?

Eastern Cape  
Free State  
Gauteng  
KwaZulu-Natal  
Limpopo  
Mpumalanga  
Northern Cape  
North West  
Western Cape

Q13. What is your current work setting?

(You may select more than one option)

Private Hospital  
Public Hospital  
Rehabilitation Centre  
Public School  
Private School  
Private Practice  
University

Other, please specify:

Q14. In which language/s do you provide AAC therapy?

English  
Afrikaans  
isiNdbele  
isiXhosa  
isiZulu  
Sepedi  
Sesotho  
Setswana  
siSwati  
Tshivenda  
Xsitsonga

Other, please specify

**Q15.** In the past year, how many individuals have you provided AAC-related services to?

None

1-5

6-10

11-15

16-20

More than 20

## Assessment in AAC

**Q16.** Do you conduct assessments on individuals with little or no functional speech who require AAC?

Yes

No

**Q17.** What is your current assessment approach for individuals who require AAC?

Norm referenced / Standardized tests.

Functional assessments.

Authentic assessments (observations in natural setting).

A combination of the above.

**Q18.** Indicate whether your caseload is primarily:

Children

Adults

Equal caseload of both

**Q19.** How frequently do you consider the following background information of the individual with little or no functional speech (LNFS), during an AAC assessment?

|   | Never | Sometimes | Fairly often | Most of the time | Always |    |    |    |    |     |
|---|-------|-----------|--------------|------------------|--------|----|----|----|----|-----|
| 0 | 10    | 20        | 30           | 40               | 50     | 60 | 70 | 80 | 90 | 100 |

**Demographics** (including economic status)

**Medical** history

## Educational history

## Gross motor skills

### Fine motor skills

### Cognitive skills

## Sensory skills

## Speech skills

## Receptive language skills

## Expressive language skills

**Social and emotional skills:** Including elements such as behaviour regulation, ability to engage appropriately with different people (strangers, peers, family etc.)

Q20. According to your primary caseload, how important are the following areas for you to include in an AAC assessment?

| Not important |    |    | Sometimes important | Fairly important |    |    | Important most of the time | Always important |    |     |
|---------------|----|----|---------------------|------------------|----|----|----------------------------|------------------|----|-----|
| 0             | 10 | 20 | 30                  | 40               | 50 | 60 | 70                         | 80               | 90 | 100 |

**Basic communication:** Communicating of basic needs

**Representational skills:**

Ability to match various symbol levels (most concrete to most abstract) to appropriate referent

**Choice making:**

Individual's ability to make meaningful choices from alternative options provided

**Sorting:**

Ability to categorize various representations, sort into groups/classes

**Cause and effect:**

Understanding that certain behaviours can have an influence on the immediate environment

**Imitation:**

Individual's ability to imitate tasks of increasing complexity (e.g. bodily actions - single object actions - multiple step imitations)

**Daily routines:**

Including direct assessment of activities which occur daily in individual with LNFS's life

**Preferences of individual with LNFS:**

What do they want to communicate, as well as how they would prefer to do so

**Preferences of family and significant others:**

What do they want individual with LNFS to communicate, as well as how they would prefer it to be communicated

**Communication environments:**

Including a record of communication situations in which the person with LNFS find themselves, as well as which potential communication partners they may have

**Device trials:**

Trials various communication devices to assess the most appropriate options

Q23. What informs your AAC assessment approach?

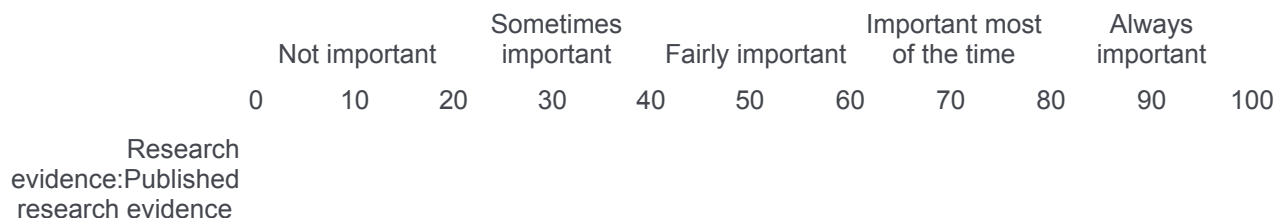

**Clinical expertise:**

The views of other  
professionals

**Personal clinical  
expertise:**

Familiar  
theory/approach that  
has worked for you  
before

**Websites:**

Including google  
searches

**Available  
resources:**

Resources readily  
available to you as  
clinician (e.g. cd's,  
web resources,  
paper-based  
resources, etc)

**Intervention in AAC**

Q24. Do you provide AAC intervention?

Yes

No

Q25. For which of the following diagnoses do you frequently recommend AAC? Select all that apply.

Aphasia

Autism Spectrum Disorder

Developmental Apraxia of Speech

Developmental Disabilities

Motor Neuron Disease

Temporary users of AAC (e.g. Intensive Care Unit patients)

Traumatic Brain Injury

Other, please specify:



Q26. Rate how each of the following informs your intervention approach:

|                                                                                                | Not Important |    | Sometimes important |    | Fairly important |    | Important most of the time |    | Always important |    |     |
|------------------------------------------------------------------------------------------------|---------------|----|---------------------|----|------------------|----|----------------------------|----|------------------|----|-----|
|                                                                                                | 0             | 10 | 20                  | 30 | 40               | 50 | 60                         | 70 | 80               | 90 | 100 |
| <b>Research evidence:</b><br>Published research evidence                                       |               |    |                     |    |                  |    |                            |    |                  |    |     |
| <b>Clinical expertise:</b><br>The views of other professionals                                 |               |    |                     |    |                  |    |                            |    |                  |    |     |
| <b>Personal clinical expertise:</b><br>Familiar theory/approach that has worked for you before |               |    |                     |    |                  |    |                            |    |                  |    |     |
| <b>Websites:</b><br>Including google searches                                                  |               |    |                     |    |                  |    |                            |    |                  |    |     |
| <b>Available resources:</b><br>Resources readily available to you as clinician                 |               |    |                     |    |                  |    |                            |    |                  |    |     |

Q27. When implementing AAC, do you work in a team?

Yes

No

Q28. If yes, please specify who forms part of the team involved in AAC intervention:

Doctors

Family members

Person who uses AAC

Nurses

Occupational Therapists

Physiotherapists

Social Workers

Teachers

Other, please specify:

Q29. Do you refer individuals who need AAC to other professionals?

Yes

No

Q30. To which other professionals do you refer?

Q31. Rate the importance of consultation with the individual who uses AAC, within the intervention process?

0 10 20 30 40 50 60 70 80 90 100

Not at all Important =  
0

Extremely important  
= 100

Q32.

Rate the importance of active involvement of family members or significant others in the AAC intervention process (i.e. determining needs, decision making and carryover of AAC skills etc).

0 10 20 30 40 50 60 70 80 90 100

Not at all Important =  
0

Extremely important  
= 100

Q33.

What are some of the challenges you are faced with in AAC intervention?

|   |       |           |              |                  |        |    |    |    |    |     |
|---|-------|-----------|--------------|------------------|--------|----|----|----|----|-----|
|   | Never | Sometimes | Fairly often | Most of the time | Always |    |    |    |    |     |
| 0 | 10    | 20        | 30           | 40               | 50     | 60 | 70 | 80 | 90 | 100 |

- **Time** constraints

- **Funding** including private, medical aid and government
- **Staying current** in developments of AAC
- **Collaboration** with other team members
- **Slow progress** by individual using AAC
- **Availability** of AAC devices
- **Low expectations** for individual who uses AAC

Q34. Are there any other challenges you are faced with in AAC intervention? If so, please specify:

**Q35.** Which AAC system(s) do you primarily recommend?

**Unaided AAC** (referring to methods of expression that do not use external items, e.g. gestures, facial expressions, etc.)

**Aided AAC** (referring to methods of expression that use external items, e.g. communication boards, speech generating devices, etc.)

**A combination** of both unaided and aided AAC.

**Q36.** How often do you recommend the following forms of unaided AAC?

|                                 | Never                 | Rarely                | Sometimes             | Most of the time      | Always                |
|---------------------------------|-----------------------|-----------------------|-----------------------|-----------------------|-----------------------|
| Facial Expressions              | <input type="radio"/> |
| Natural Gestures                | <input type="radio"/> |
| Vocalizations                   | <input type="radio"/> |
| Key Word Signing                | <input type="radio"/> |
| Signs from Tiny Handz Programme | <input type="radio"/> |
| South African Sign Language     | <input type="radio"/> |
| Makaton                         | <input type="radio"/> |

**Q37.** Do you recommend any other forms of unaided AAC? If so please specify which form and how often you recommend it:

**Q38.** Your recommendations regarding Aided AAC interventions are:

(You may select more than one option)

Non-electronic AAC system (e.g. communication board)

Electronic Dedicated AAC devices (e.g. GoTalk™)

Electronic Non-dedicated AAC system (e.g. Tablet with AAC device)

**Q39.** Which type of **non-electronic AAC system** do you usually recommend to individuals who require AAC?

Communication Boards

Communication Books

Communication Passports

Communication Schedules

Other, please specify:

**Q40.** Please indicate how frequently clients use **non-electronic AAC systems** within

|                                                                        | Never                 | Rarely                | Sometimes             | Most of the time      | Always                |
|------------------------------------------------------------------------|-----------------------|-----------------------|-----------------------|-----------------------|-----------------------|
| the therapy session.                                                   | <input type="radio"/> |
| outside the therapy session<br>(i.e. real communication<br>scenarios). | <input type="radio"/> |

**Q40.** List the **electronic dedicated AAC devices** you usually recommend to individuals that require AAC (e.g. GoTalk+4™, BIGmack)?

**Q41.** Please indicate how frequently clients use **electronic, dedicated AAC devices**

|                                                                            | Never                 | Rarely                | Sometimes             | Most of the time      | Always                |
|----------------------------------------------------------------------------|-----------------------|-----------------------|-----------------------|-----------------------|-----------------------|
| within the Therapy session                                                 | <input type="radio"/> |
| outside the therapy session<br>(i.e. real life communication<br>scenarios) | <input type="radio"/> |

**Q42.** List the **electronic non-dedicated AAC systems** you usually recommend to individual with LNFS (e.g. Windows-based tablet with Grid2 Communication software, Ipad with TaptoTalk application)?

**Q43.** Select which operation systems the non-dedicated electronic AAC systems that you recommend run on:

iOS (operating system of iPads, iPhones and iPods)

Android

Windows

**Q44.** List the AAC applications (iOS or android-based) that you recommend to individuals who require AAC?

**Q45.** Indicate how frequently clients use **electronic non-dedicated AAC systems**

|                                                                          | Never                 | Rarely                | Sometimes             | Most of the time      | Always                |
|--------------------------------------------------------------------------|-----------------------|-----------------------|-----------------------|-----------------------|-----------------------|
| within the therapy session.                                              | <input type="radio"/> |
| outside the therapy session<br>(i.e. real life communication scenarios). | <input type="radio"/> |

**Q46.** Rate the frequency of the following factors influencing the selection of applications for an **electronic non-dedicated AAC systems**?

|                                                                                                      | Not at all            | Very little           | Fairly important      | Very much so          |
|------------------------------------------------------------------------------------------------------|-----------------------|-----------------------|-----------------------|-----------------------|
| The <b>accessibility</b> of the application (i.e. how easily one can get access to the application). | <input type="radio"/> | <input type="radio"/> | <input type="radio"/> | <input type="radio"/> |
| The <b>affordability</b> of the application.                                                         | <input type="radio"/> | <input type="radio"/> | <input type="radio"/> | <input type="radio"/> |
| Previous <b>clinical experience</b> with the application.                                            | <input type="radio"/> | <input type="radio"/> | <input type="radio"/> | <input type="radio"/> |

|                                                                                                                                     | Not at all            | Very little           | Fairly important      | Very much so          |
|-------------------------------------------------------------------------------------------------------------------------------------|-----------------------|-----------------------|-----------------------|-----------------------|
| <b>Feature mapping</b> , process whereby person's, who requires AAC, strengths; abilities and needs are matched to available tools. | <input type="radio"/> | <input type="radio"/> | <input type="radio"/> | <input type="radio"/> |
| The <b>pragmatic functions</b> offered by the application.                                                                          | <input type="radio"/> | <input type="radio"/> | <input type="radio"/> | <input type="radio"/> |
| <b>Iconicity</b> of symbols used in application.                                                                                    | <input type="radio"/> | <input type="radio"/> | <input type="radio"/> | <input type="radio"/> |
| Applications ability to <b>support language development</b> .                                                                       | <input type="radio"/> | <input type="radio"/> | <input type="radio"/> | <input type="radio"/> |
| Application allows for <b>digital recordings</b> .                                                                                  | <input type="radio"/> | <input type="radio"/> | <input type="radio"/> | <input type="radio"/> |
| Application has <b>synthetic voice</b> .                                                                                            | <input type="radio"/> | <input type="radio"/> | <input type="radio"/> | <input type="radio"/> |
| Application is available in <b>other languages</b> .                                                                                | <input type="radio"/> | <input type="radio"/> | <input type="radio"/> | <input type="radio"/> |
| <b>Ease of programming</b> the application.                                                                                         | <input type="radio"/> | <input type="radio"/> | <input type="radio"/> | <input type="radio"/> |
| <b>Ease of operating</b> the application.                                                                                           | <input type="radio"/> | <input type="radio"/> | <input type="radio"/> | <input type="radio"/> |
| <b>Ease of training</b> significant others in the use of the application.                                                           | <input type="radio"/> | <input type="radio"/> | <input type="radio"/> | <input type="radio"/> |
| Application is based on <b>published research</b> .                                                                                 | <input type="radio"/> | <input type="radio"/> | <input type="radio"/> | <input type="radio"/> |

Q47. Which Windows-based software do you use/recommend for individuals who require AAC?

**Q48.** Regarding all the electronic aided AAC systems you use, how frequently do you use the following display formats?

|                                                                                                                                                            | Never                 | Rarely                | Sometimes             | Most of the time      | Always                |
|------------------------------------------------------------------------------------------------------------------------------------------------------------|-----------------------|-----------------------|-----------------------|-----------------------|-----------------------|
| <b>Static/fixed displays</b><br>(refers to format where symbols stay in a fixed format)?                                                                   | <input type="radio"/> |
| <b>Dynamic displays</b><br>(typically generate electronically produced visual symbols that, when pressed, change the set of selections that is displayed)? | <input type="radio"/> |
| <b>Hybrid/mixed displays</b><br>(display has both static and dynamic elements to it)?                                                                      | <input type="radio"/> |
| <b>Visual scene displays</b><br>(visual scene displays present and entire picture or scene: for example, a school classroom, park, or person)?             | <input type="radio"/> |
| Grid displays:(refers to the grouping of symbols according to categories such as people, places, feelings etc)?                                            | <input type="radio"/> |

**Q49.** How do you primarily determine vocabulary for a specific AAC device?

Ecological/environmental inventories/routines (this is a list of identified communication demands and opportunities within the individual with LNFS's environment).

List of words that individual with LNFS attempts to communicate.

Word lists of typically developing peers.

Context specific conversations.

Family preferences.

Core vocabulary lists



Preferences of individuals who use AAC

Other, please specify:

**Q50.** What is the primary focus of initial vocabulary selection for a person who requires AAC?

Core Vocabulary (i.e. words used frequently and in a variety of situations, e.g. I, have, want, etc).

Fringe Vocabulary (i.e. words which are more situation specific, e.g. funny, park, evaporation, etc).

Both

**Q51.** How do you organise your vocabulary? Primarily:

Activity based

Semantic categories

Parts of speech organisation (e.g. nouns, verbs, pronouns, etc)

Category based (e.g. food page, clothing page, etc)

Alphabetical organization

Other, please specify:

**Q52.** When creating a display, how often do you make sure to include:

|                                                 | Never                 | Rarely                | Sometimes             | Most of the Time      | Always                |
|-------------------------------------------------|-----------------------|-----------------------|-----------------------|-----------------------|-----------------------|
| Subject<br>(I, Me, You)                         | <input type="radio"/> |
| Actions<br>(Verbs, Events)                      | <input type="radio"/> |
| Descriptors<br>(Adjectives)                     | <input type="radio"/> |
| Nouns<br>(People, Objects)                      | <input type="radio"/> |
| Emotional responses<br>(Feelings)               | <input type="radio"/> |
| Pronouns<br>(He, she, we, prepositions,<br>etc) | <input type="radio"/> |

## Aided Symbols

Q53. How frequently do you recommend the following aided symbols?

|                                     | Frequency of recommendation |                       |                       |                       |                       |
|-------------------------------------|-----------------------------|-----------------------|-----------------------|-----------------------|-----------------------|
|                                     | Never                       | Rarely                | Sometimes             | Most of the time      | Always                |
| Objects                             | <input type="radio"/>       | <input type="radio"/> | <input type="radio"/> | <input type="radio"/> | <input type="radio"/> |
| Tangible Symbols                    | <input type="radio"/>       | <input type="radio"/> | <input type="radio"/> | <input type="radio"/> | <input type="radio"/> |
| Colour Photographs                  | <input type="radio"/>       | <input type="radio"/> | <input type="radio"/> | <input type="radio"/> | <input type="radio"/> |
| Black and White Photographs         | <input type="radio"/>       | <input type="radio"/> | <input type="radio"/> | <input type="radio"/> | <input type="radio"/> |
| Picture Communication Symbols (PCS) | <input type="radio"/>       | <input type="radio"/> | <input type="radio"/> | <input type="radio"/> | <input type="radio"/> |
| Widget                              | <input type="radio"/>       | <input type="radio"/> | <input type="radio"/> | <input type="radio"/> | <input type="radio"/> |
| Blissymbols                         | <input type="radio"/>       | <input type="radio"/> | <input type="radio"/> | <input type="radio"/> | <input type="radio"/> |
| Minspeak                            | <input type="radio"/>       | <input type="radio"/> | <input type="radio"/> | <input type="radio"/> | <input type="radio"/> |
| Makaton                             | <input type="radio"/>       | <input type="radio"/> | <input type="radio"/> | <input type="radio"/> | <input type="radio"/> |
| SymbolStix                          | <input type="radio"/>       | <input type="radio"/> | <input type="radio"/> | <input type="radio"/> | <input type="radio"/> |

Q54. How often are the following aspects targeted by providing aided AAC symbols?

|                                          | Never                 | Rarely                | Sometime              | Most of the time      | All of the time       |
|------------------------------------------|-----------------------|-----------------------|-----------------------|-----------------------|-----------------------|
| Support for <b>expressive language</b> . | <input type="radio"/> |

|                                                   | Never                 | Rarely                | Sometime              | Most of the time      | All of the time       |
|---------------------------------------------------|-----------------------|-----------------------|-----------------------|-----------------------|-----------------------|
| Support for <b>receptive language</b> .           | <input type="radio"/> |
| <b>Organizational and transitional schedules.</b> | <input type="radio"/> |
| To improve <b>interpersonal communication</b> .   | <input type="radio"/> |
| To aid <b>literacy learning</b> .                 | <input type="radio"/> |

Q55. How often do the following factors influence your recommendations of aided AAC symbols?

|                                                                  | Never                 | Sometimes             | Fairly often          | Most of the Time      | Always                |
|------------------------------------------------------------------|-----------------------|-----------------------|-----------------------|-----------------------|-----------------------|
| Access to social media (i.e. Facebook, Twitter, WhatsApp, etc.). | <input type="radio"/> |
| <b>Published research</b> evidence on aided symbol.              | <input type="radio"/> |
| Previous <b>clinical experience</b> .                            | <input type="radio"/> |
| The person who uses AAC <b>skills</b> .                          | <input type="radio"/> |
| <b>Peer</b> recommendations.                                     | <input type="radio"/> |
| <b>Family</b> views.                                             | <input type="radio"/> |
| <b>Availability</b> of resource.                                 | <input type="radio"/> |
| <b>Learnability</b> - easy to learn.                             | <input type="radio"/> |

Q56. Are there any other factors that influence your recommendation of Aided AAC symbols? If so please specify as well as how often these factors influence your recommendation:

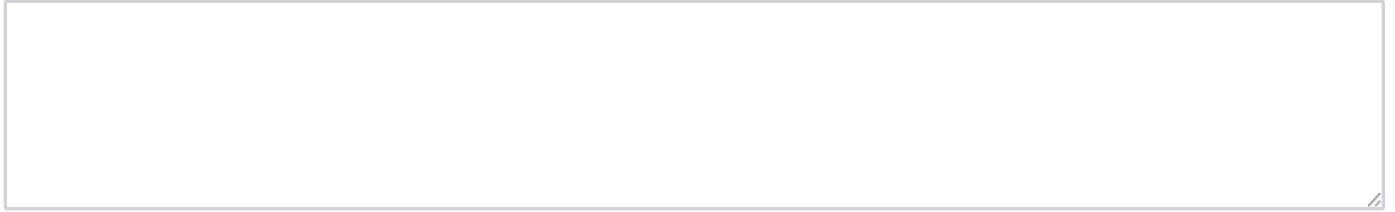

**Q60.** Kindly provide your email address. This will only be used to email your Takelot voucher should you be one of the first 25 to complete the survey. Thank you

Powered by Qualtrics
